# Supplementary material
Source: MDPI journal article supplement (https://www.mdpi.com/2571-6255/5/3/62)
Supplement: s1 [file s1]

Article:

**Tropical peat fire behaviour and associated carbon emissions**

Submission to:

**Fire**

**Supplementary Materials**

| Kode FSE    | Sketch                                                                              | Photo                                                                                |
|-------------|-------------------------------------------------------------------------------------|--------------------------------------------------------------------------------------|
| FSE-MTU-001 | 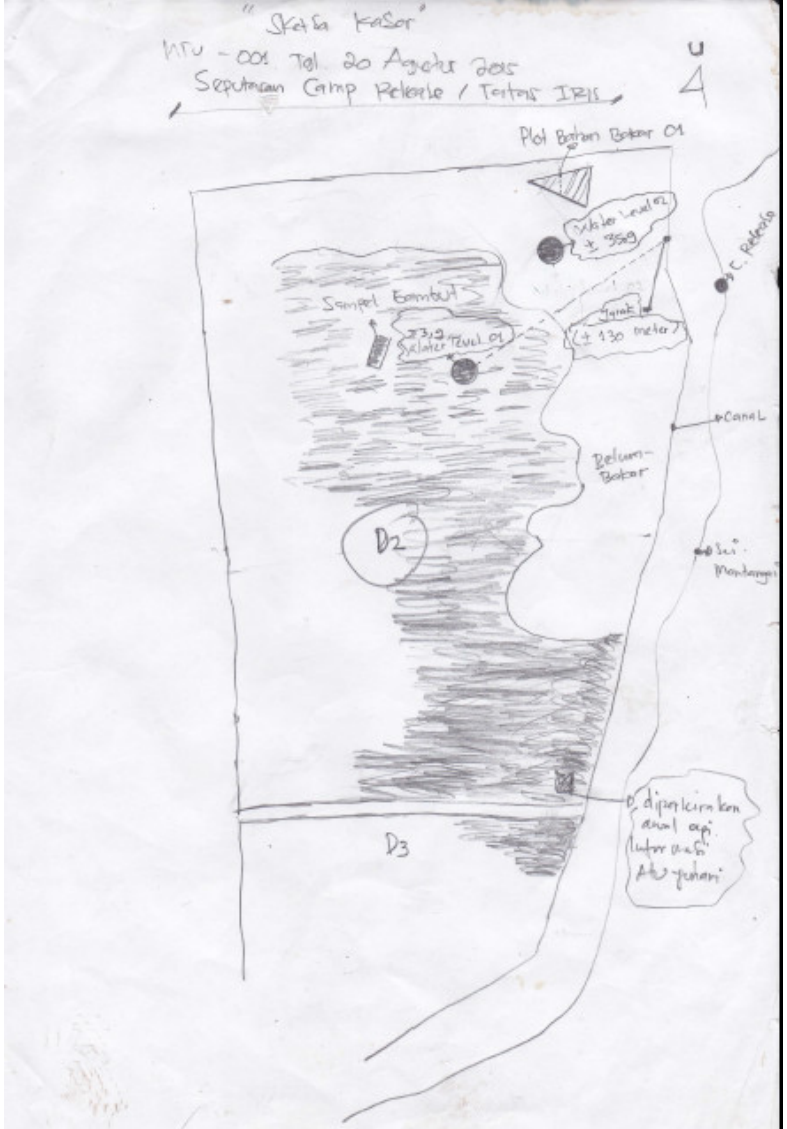 |  |

|             |
|-------------|
| FSE-MTU-002 |
|-------------|

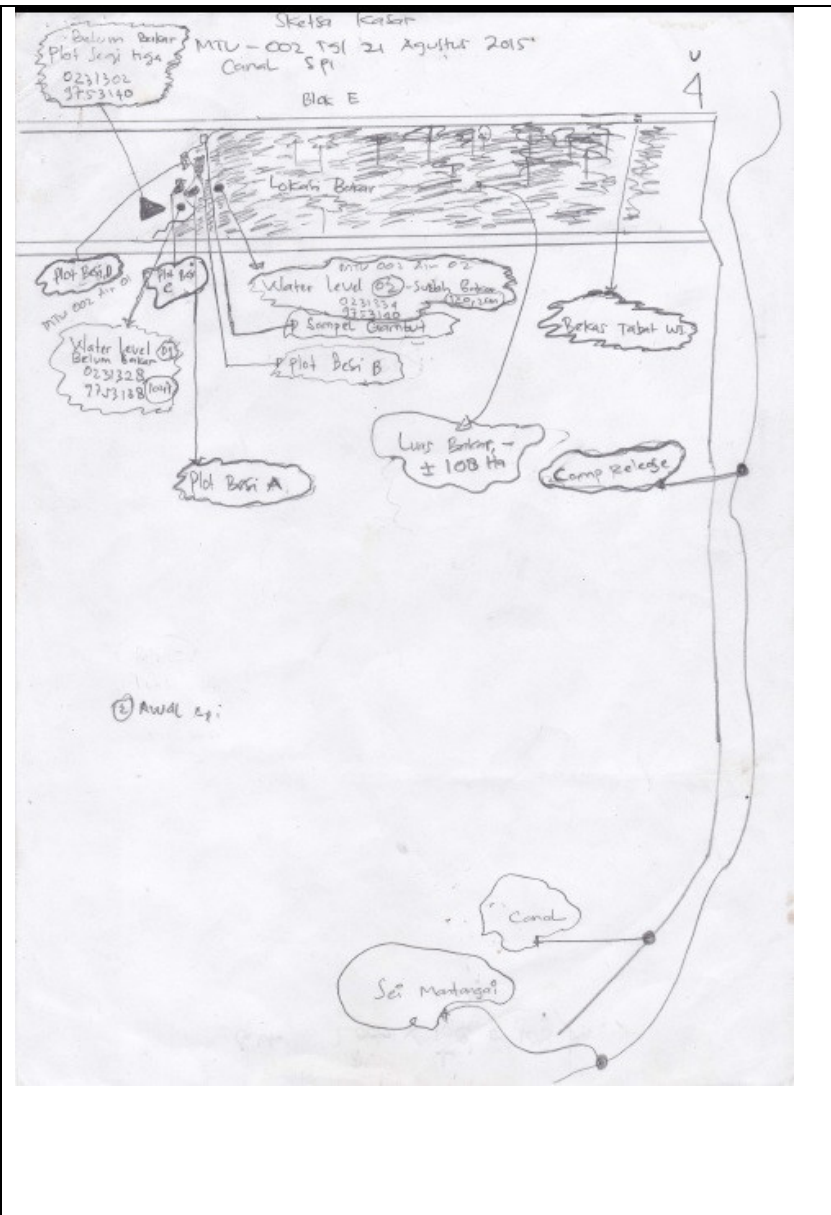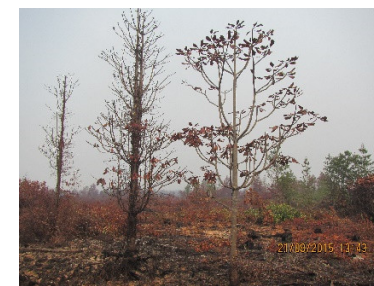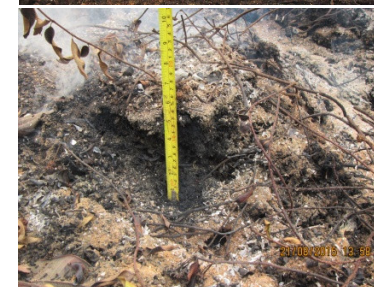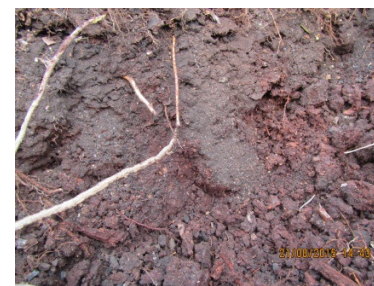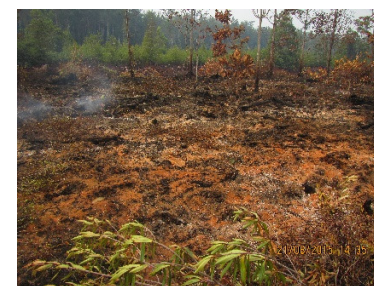



FSE-MTU-003

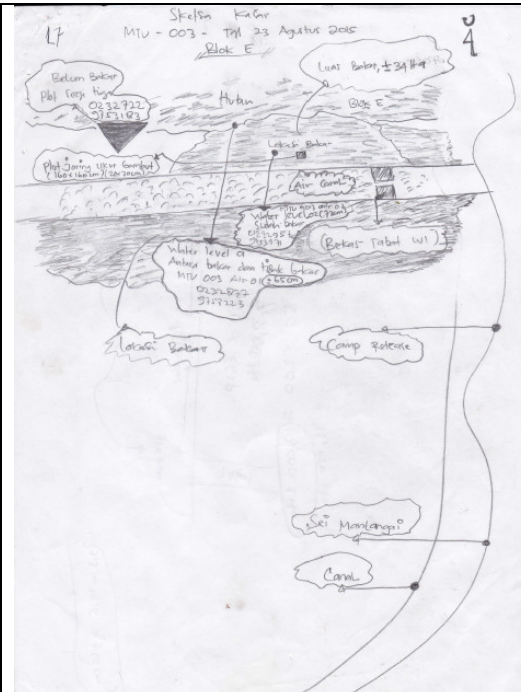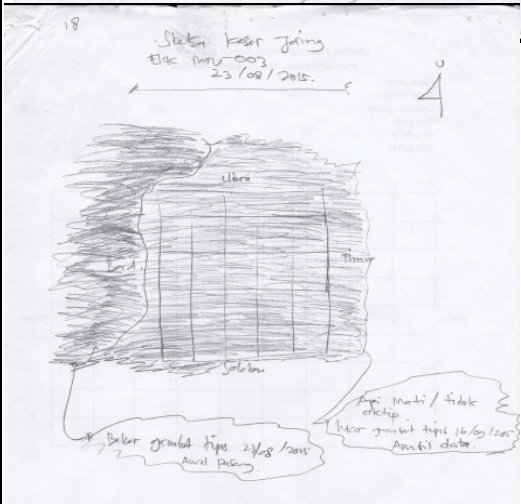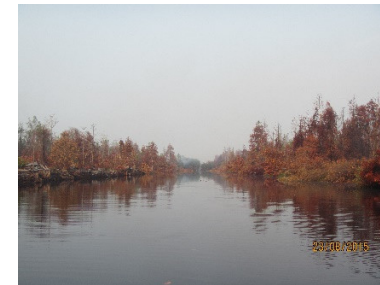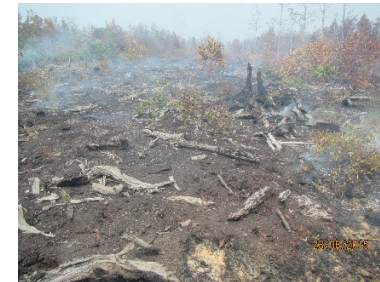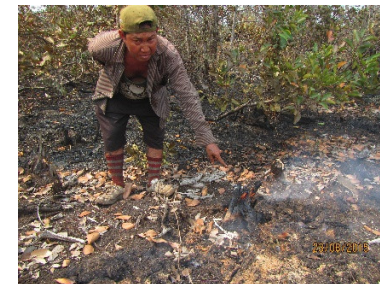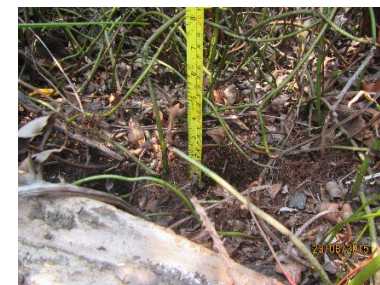

FSE-KTP-001

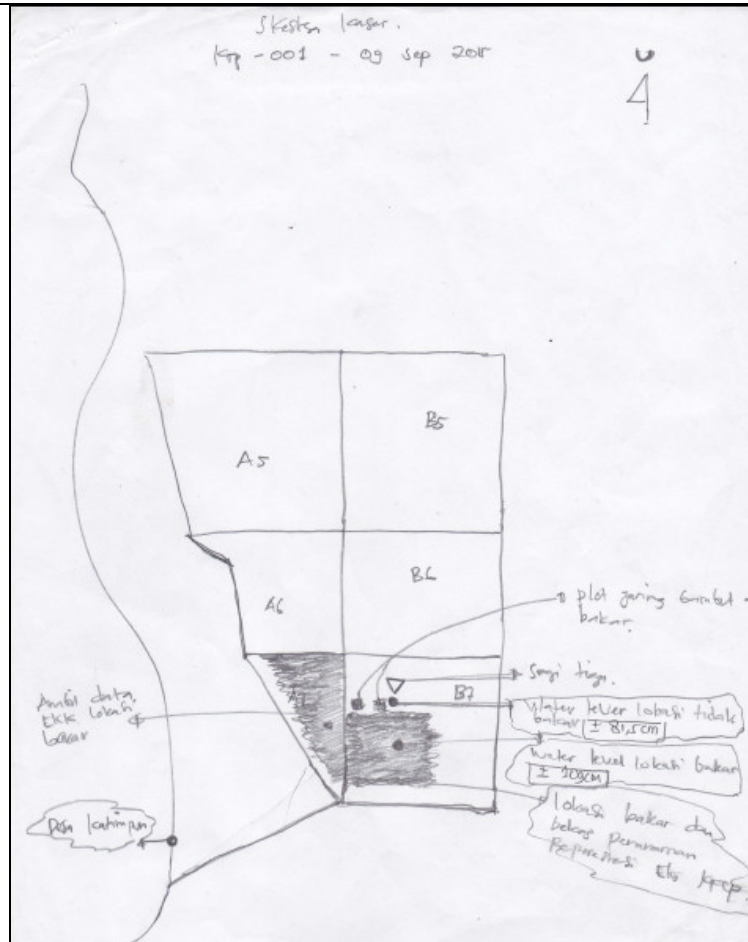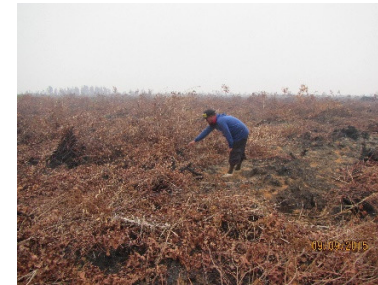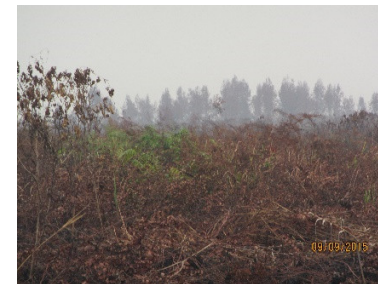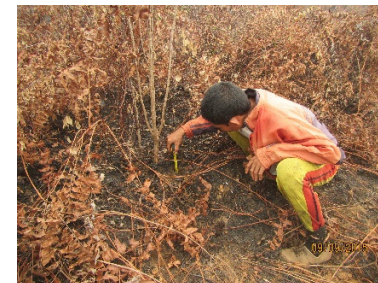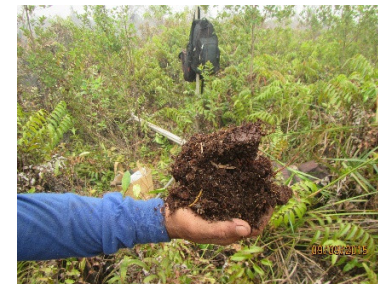



FSE-AHS-002

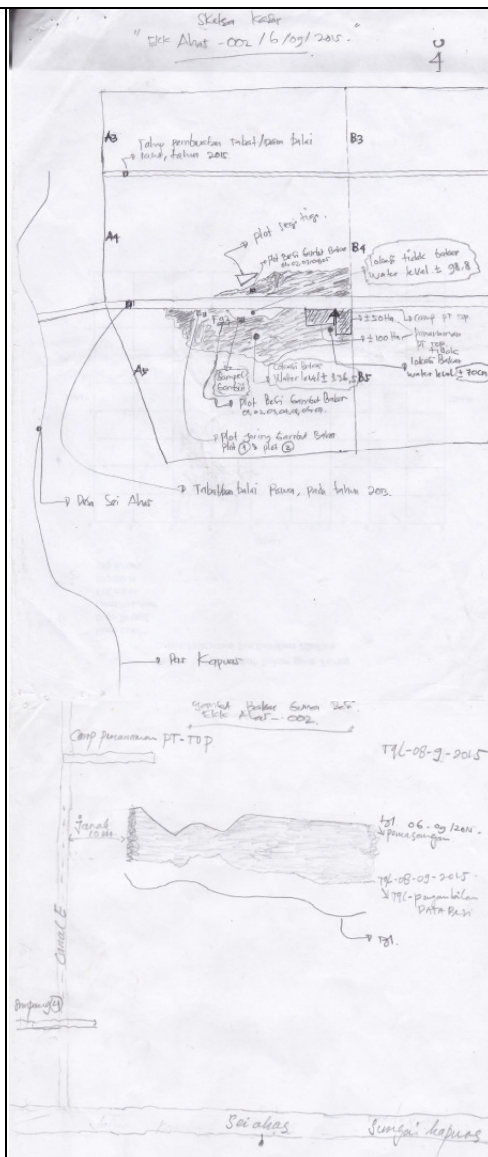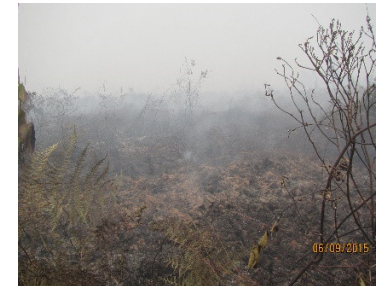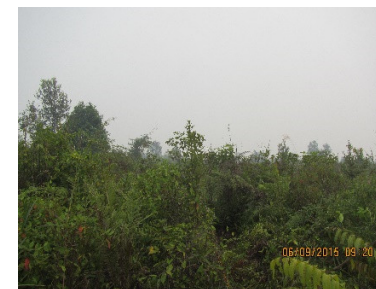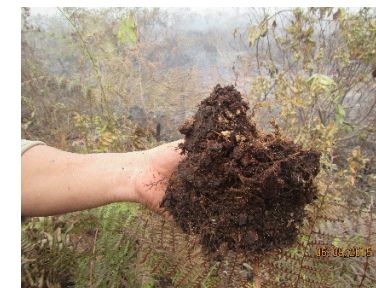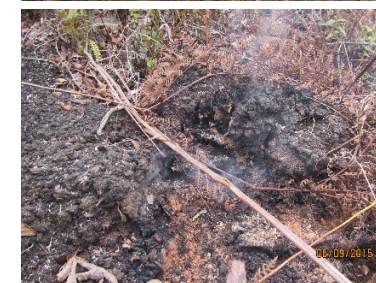

FSE-MTU-005

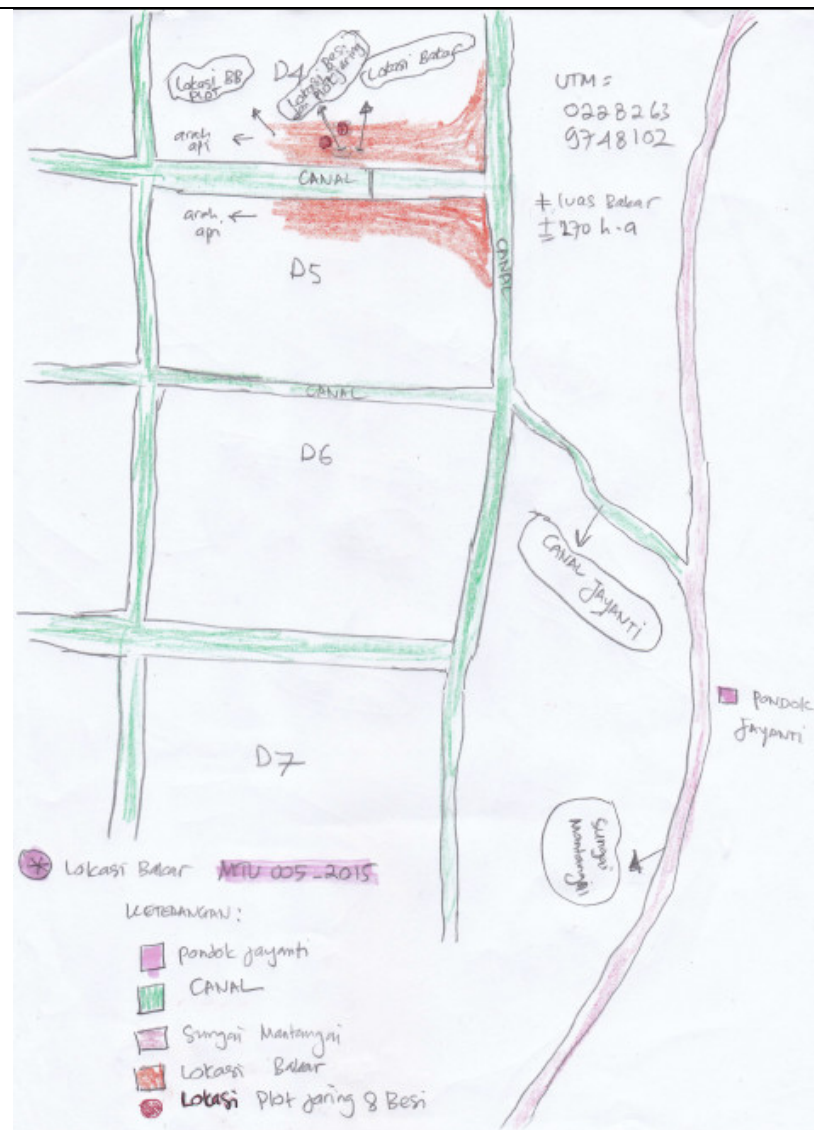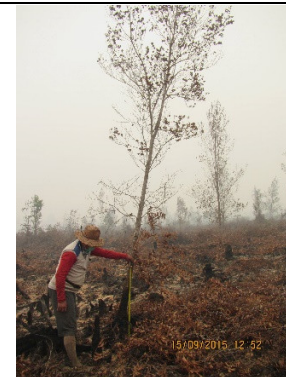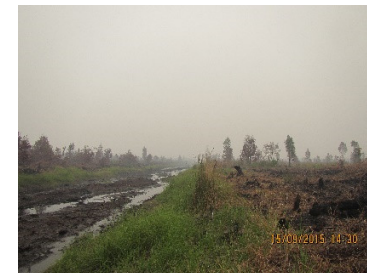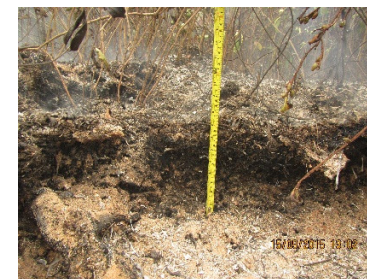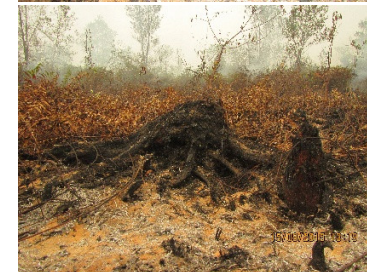

**Figure S1:** FSE field sketches and photos

**Table S1:** Environmental data collected at each FSE location

| FSE code | Study number (n) |     |     | FSE Date | On a berm | Temp | RH | Wind speed | WTD ahead fire | WTD behind fire | DF Water | Burn scar | Burn area |
|----------|------------------|-----|-----|----------|-----------|------|----|------------|----------------|-----------------|----------|-----------|-----------|
|          | Spread           | Vol | MC% |          | Y/N       | C    | %  | m/s        | (cm)           | (cm)            | (m)      | #         | (ha)      |
| MTU-001  | 0                | 2   | 1   | 20/08/15 | N         | 32,0 | 49 | 1,3        | -59,9          | -35,9           | 130      | 3         | 50        |
| MTU-002  | 6                | 0   | 1   | 21/08/15 | Y         | 36,6 | 39 | 0,6        | -102,7         | -120,2          | 10       | 8         | 108       |
| MTU-003  | 0                | 1   | 0   | 23/08/15 | N         | 37   | 41 | 0,4        | -65            | -73             | 15       | 4         | 34        |
| AHA-002  | 2                | 2   | 1   | 06/09/15 | Y         | 35,9 | 52 | 2,1        | -98,8          | 136,5           | 8        | 6         | 500       |
| KTP-001  | 0                | 2   | 0   | 09/09/15 | N         | 34,1 | 40 | 0,5        | -81,5          | -109            | 5        | 4         | 100       |
| MTU-005  | 1                | 2   | 1   | 15/09/15 | N         | 32,5 | 37 | 1,2        | NA             | -95,0           | 50       | 4         | 270       |

FSE - Fire Scene Evaluation

RH - relative

humidity

WTD - water table depth

DF - distance from
